# Supplementary material for: Molecular dipole engineering-assisted strain release for mechanically robust flexible perovskite solar cells
Source: Royal Society of Chemistry journal article supplement (doi:10.1039/d3ee02569a), 2023-01-01
Supplement: d3ee02569a1.pdf [file d3ee02569a1.pdf]

## Supplementary Information

### **Molecular dipole engineering assisted strain release for mechanically robust flexible perovskite solar cells**

Lisha Xie<sup>†ab</sup>, Songyu Du<sup>†ab</sup>, Jun Li<sup>†ab</sup>, Chang Liu<sup>ab</sup>, Zhenwei Pu<sup>ab</sup>, Xinyu Tong<sup>ab</sup>, Jian Liu<sup>ab</sup>, Yaohua Wang<sup>ab</sup>, Yuanyuan Meng<sup>ab</sup>, Mengjin Yang<sup>ab</sup>, Wei Li<sup>\*ab</sup> and Ziyi Ge<sup>\*ab</sup>

<sup>a</sup>Zhejiang Provincial Engineering Research Center of Energy Optoelectronic Materials and Devices, Ningbo Institute of Materials Technology and Engineering, Chinese Academy of Sciences, Ningbo 315201, P. R. China.

E-mail: [liweil1987@nimte.ac.cn](mailto:liweil1987@nimte.ac.cn), [geziyi@nimte.ac.cn](mailto:geziyi@nimte.ac.cn).

<sup>b</sup>Center of Materials Science and Optoelectronics Engineering, University of Chinese Academy of Sciences, Beijing, 100049, P. R. China.

\* Corresponding authors.

† Contributed equally to this work.

## **Experimental**

### **Materials and solvents**

For this work, [2-(3,6-dimethoxy-9H-carbazol-9-yl)ethyl]phosphonic acid (MeO-2PACz, 98.0%), N,N-dimethylformamide (DMF, 99.8%), and dimethyl sulfoxide (DMSO, 99.8%) were purchased from Tokyo Chemical Industry Co., Ltd. (TCI). Acetone (98%) and diethyl ether (99.7%) were purchased from Sinopharm Chemical Reagent Co., Ltd. Isopropanol (IPA, 99.7%) and ethanol (99.5%) were purchased from General Reagent.

Methylammonium chloride (MACl, 99.9%), methylammonium bromide (MABr, 99.99%), formamidinium iodide (FAI, 99.99%), cesium iodide (CsI, 99.9%), lead(II) iodide (PbI<sub>2</sub>, 99.99%), lead(II) bromine (PbBr<sub>2</sub>, 99.999%), buckminsterfullerene (C<sub>60</sub>, 99.99%), and bathocuproine (BCP, 99.9%) were purchased from Advanced Election Technology Co., Ltd.

### **Preparation of control and modified perovskite precursor solution**

A total of 3.68 mg MABr, 276.98 mg FAI, 18.11 mg MACl, 12.70 mg PbBr<sub>2</sub>, 22.47 mg CsI, and 821.47 mg PbI<sub>2</sub> were dissolved in 833 μL DMF and 167 μL DMSO solution, and stirred at room temperature overnight to prepare the undoped precursor solution. For the doped solution, another 1 mg each of 1F-2CN, 2F-2CN, and 3F-2CN was added in the previous solution.

### **Device fabrication**

The inverted device architecture was PEN(ITO)/MeO-2PACz/PSK/C<sub>60</sub>/BCP/Ag. The PEN(ITO) substrate was treated with UV-ozone for 15 min without cleaning. MeO-2PACz with a concentration of 0.3 mg/mL in IPA was spin-coated at 4000 rpm for 30 s onto treated ITO substrates and annealed at 100 °C for 10 min to fabricate the hole selection layer. The as-prepared perovskite precursor solution was spin-coated onto the modified HTL substrate at 1000 and 5000 rpm for 10 and 40 s, respectively. During the last 20 s of the spinning process, the film was treated by drop-casting diethyl ether (450 μL). The substrates were annealed on a hot plate at 100 °C for 30 min. Then, 25 nm thick C<sub>60</sub>, 6 nm thick BCP, and 100 nm thick Ag were deposited on the top layer-wise via thermal evaporation.

## Characterization

The  $^1\text{H}$  and  $^{13}\text{C}$  NMR spectra were recorded on Bruker (AVANCE III 600 MHz). The XPS spectra were determined using a monochromatic Al-K $\alpha$  (1486.6 eV) radiation source (Shimadzu, Axis Supra). The top-view morphologies were recorded on Gemini SEM 300 and Dimension ICON SPM. Dimension ICON SPM was also used to obtain the Young's modulus and c-AFM. The energy level was determined via UPS (R3000, Scienta) with HeI (21.2 eV) as the excitation source and UV-vis spectroscopy (Lambda 950). The X-ray diffraction (XRD) experiment was performed using Mini Flex 600 (Rigaku, Japan). Depth-resolved GIXRD measurements were performed using a Rigaku SmartLab five-axis X-ray diffractometer at 45 kV and 200 mA with Cu K $\alpha$  radiation ( $\lambda = 1.54050 \text{ \AA}$ ). The temperature-dependent PL spectra, steady-state PL, and TRPL decay spectra were measured using a fluorescence spectrometer (FLS 980) with a 450 nm laser (EPL-510, Edinburgh Instruments Ltd.). Femtosecond TAS was performed using SOL-F-K-HP-T at 400 nm. The  $J$ - $V$  characteristics were measured using a solar simulator (San-EI Electric) with standard AM 1.5G ( $100 \text{ mW cm}^{-2}$ ) illumination and Keithley 2400 source. The light intensity was calibrated using a standard silicon solar cell, AK-200 (Konica Minolta). EQE data were obtained using QE-R (Enlitech).

### Note 1: Strain<sup>1-3</sup>

According to Bragg's law and generalized Hooke's law, the residual strain can be calculated as the slope of the following function:

$$\sigma = -\frac{E}{2(1+\nu)} \frac{\pi}{180^\circ} \cot\theta_0 \frac{\partial(2\theta)}{\partial \sin^2\varphi}$$

where  $\varphi$ ,  $E$ ,  $2\theta$ ,  $\theta_0$ , and  $\nu$  represent the angle of diffraction vector corresponding to the sample surface normal, perovskite modulus, scattering angle of the actual perovskite, half of the scattering angle ( $2\theta_0$ ) corresponding to a given diffraction peak for stress-free perovskite, and Poisson's ratio of the perovskite, respectively.

### Note 2: TRPL/TAS<sup>4</sup>

The TRPL/TAS decay curves were fitted by the following bi-exponential function:

$$f(t) = A_1 e^{\frac{-t}{\tau_1}} + A_2 e^{\frac{-t}{\tau_2}} + B$$

$$\tau_{ave} = \frac{A_1 \tau_1^2 + A_2 \tau_2^2}{A_1 \tau_1 + A_2 \tau_2},$$

where  $\tau_1$  represents the short transient lifetime,  $\tau_2$  represents the long transient lifetime,  $A_1$  and  $A_2$  are constants, and  $B$  is the baseline offset constant.

**Note 3: Electron–phonon coupling<sup>5-7</sup>**

The electron-phonon coupling was calculated by the Bose-Einstein thermal distribution equation:

$$\Gamma(T) = \Gamma_{inh} + \frac{\Gamma_{LO}}{e^{\frac{h\omega}{k_B T}} - 1}$$

where  $\Gamma_{inh}$  is the inhomogeneous line width due to structural disorder,  $\Gamma_{LO}$  is the electron-LO phonon coupling coefficient, and  $h\omega$  represents the LO phonon energy.

**Note 4: SCLC<sup>8,9</sup>**

The trap densities ( $N_t$ ) of the perovskite films were calculated using the following equation:

$$N_t = \frac{2V_{TFL}\epsilon_0\epsilon_r}{eL^2},$$

where  $e$ ,  $L$ ,  $\epsilon_0$ , and  $\epsilon_r$  represent the electron charge, thickness of perovskite film, vacuum permittivity, and relative dielectric constant of perovskite, respectively.

**Synthesis**

All reagents were purchased from the Casmart Reagent Platform and used as received without further purification. All compounds were synthesized via one-step common palladium-catalyzed Suzuki coupling reactions of 5-bromoisophthalonitrile (**2CN-Br**) and corresponding boric acid-functionalized fragments. The synthesis process was showed in detail below.

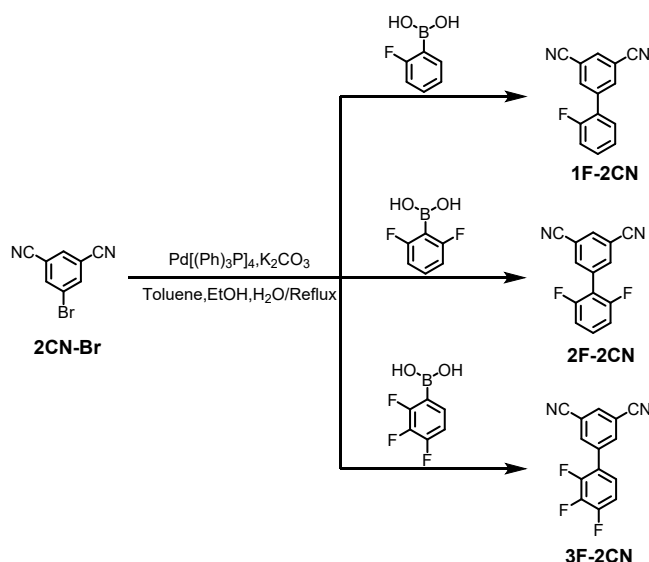

**Schemes S1.** Chemical structures and synthetic routes for **1F-2CN**, **2F-2CN**, and **3F-2CN**.

**Synthesis of 2'-fluoro-[1,1'-biphenyl]-3,5-dicarbonitrile (1F-2CN):**

**2CN-Br** (2.06 g, 10 mmol), (2-fluorophenyl)boronic acid (1.54g, 10 mmol), Pd(P(Ph)<sub>3</sub>)<sub>4</sub> (0.57 g, 0.5 mmol, 4.44 mmol), K<sub>2</sub>CO<sub>3</sub> (6.90 g, 50 mmol) were dissolved in 120 mL toluene and 30 mL EtOH in a 250 mL three-necked flask. The mixture was continuously stirred at 90 °C for 8 hours under the nitrogen atmosphere. After cooling to room temperature, 200 mL of deionized water was added to the mixture. The reaction mixture was extracted with dichloromethane (3 x 100 mL), dried over anhydrous magnesium sulfate, and the solvent was removed under vacuum to give a red powder. The crude product was purified by column chromatography on silica gel (PE/DCM = 10:1, v/v). The product was further purified by sublimation and obtained 1.78 g white solid, yielding 80.1 %. <sup>1</sup>H NMR (400 MHz, Chloroform-*d*) δ 8.07 (d, *J* = 1.5 Hz, 2H), 7.93 (t, *J* = 1.6 Hz, 1H), 7.53 – 7.38 (m, 2H), 7.31 (td, *J* = 7.6, 1.2 Hz, 1H), 7.28 – 7.15 (m, 1H). <sup>13</sup>C NMR (151 MHz, CDCl<sub>3</sub>) δ 138.73, 136.29, 136.26, 133.95, 131.52, 130.16, 125.22, 116.83, 116.68, 116.56, 114.47. TOF-MS (APCI) *m/z*, found: 222.0611, Calculated for C<sub>14</sub>H<sub>7</sub>FN<sub>2</sub>: 222.0593.

**Synthesis of compound 2',6'-difluoro-[1,1'-biphenyl]-3,5-dicarbonitrile (2F-2CN):**

The reaction of intermediate **2CN-Br** with (2,6-fluorophenyl)boronic acid following the same procedure for the synthesis of **1F-2CN** generated the pure **2F-2CN** as a

white powder (yield:78 %).  $^1\text{H}$  NMR (400 MHz, Chloroform-*d*)  $\delta$  8.01 (q,  $J = 1.4$  Hz, 2H), 7.97 (d,  $J = 1.6$  Hz, 1H), 7.44 (tt,  $J = 8.4, 6.3$  Hz, 1H), 7.08 (t,  $J = 8.2$  Hz, 2H).  $^{13}\text{C}$  NMR (151 MHz,  $\text{CDCl}_3$ )  $\delta$  138.79, 137.69, 134.61, 133.77, 116.38, 115.64, 115.28, 114.44, 112.38. TOF-MS (APCI)  $m/z$ , found: 240.0513, Calculated for  $\text{C}_{14}\text{H}_6\text{F}_2\text{N}_2$ : 240.0499.

***Synthesis of compound 2',3',4'-trifluoro-[1,1'-biphenyl]-3,5-dicarbonitrile (3F-2CN):***

The reaction of intermediate **2CN-Br** with (2,3,4-trifluorophenyl)boronic acid following the same procedure for the synthesis of **1F-2CN** generated the pure **2F-2CN** as a white powder (yield:78 %).  $^1\text{H}$  NMR (400 MHz, Chloroform-*d*)  $\delta$  8.01 (t,  $J = 1.4$  Hz, 2H), 7.97 (t,  $J = 1.5$  Hz, 1H), 7.16 (dd,  $J = 7.3, 5.1$  Hz, 2H).  $^{13}\text{C}$  NMR (151 MHz,  $\text{CDCl}_3$ )  $\delta$  136.94, 136.01, 135.99, 134.57, 123.69, 123.67, 123.65, 116.23, 114.87, 113.44, 113.32. TOF-MS (APCI)  $m/z$ , found: 258.0413, Calculated for:  $\text{C}_{14}\text{H}_5\text{F}_3\text{N}_2$ : 258.0405.



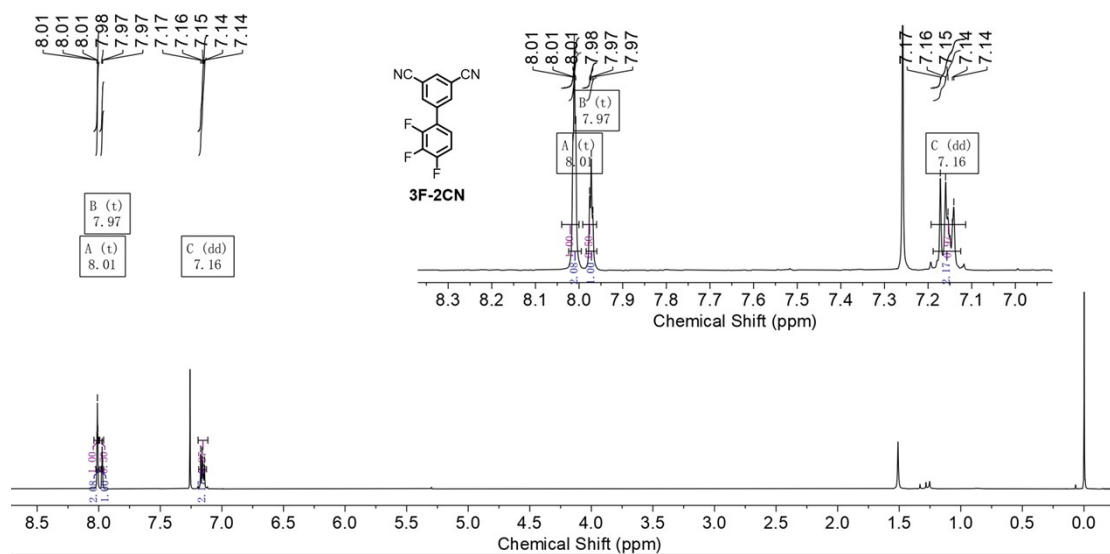

**Fig. S3.**  $^1\text{H}$  NMR spectra of 3F-2CN in  $d\text{-CDCl}_3$ .

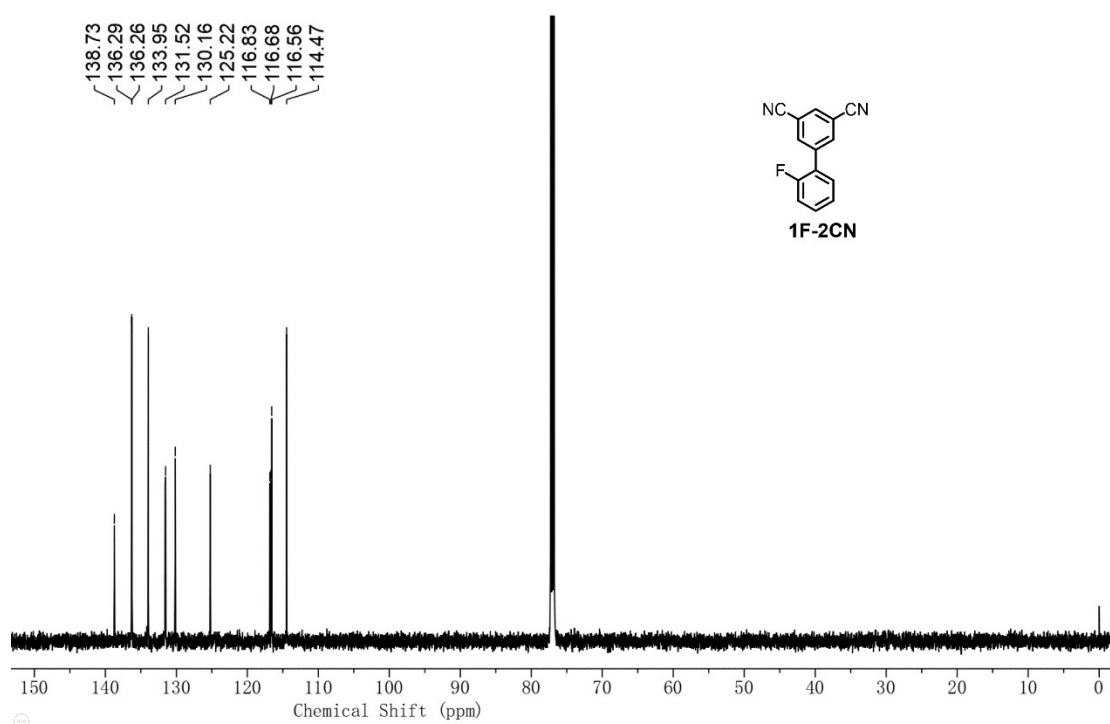

**Fig. S4.**  $^{13}\text{C}$  NMR spectra of 1F-2CN in  $d\text{-CDCl}_3$ .



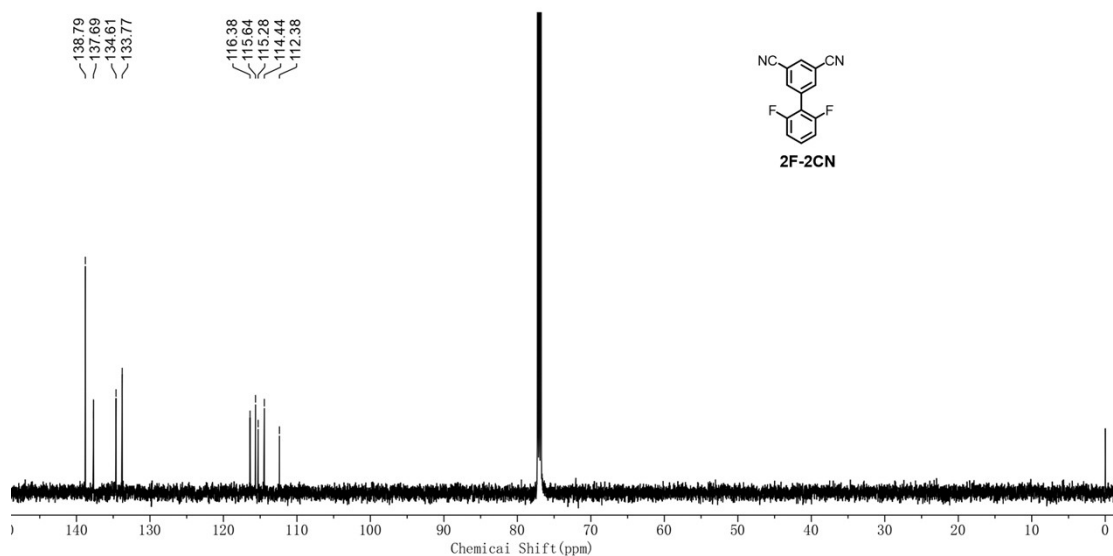

**Fig. S5.**  $^{13}\text{C}$  NMR spectra of 2F-2CN in  $d\text{-CDCl}_3$ .

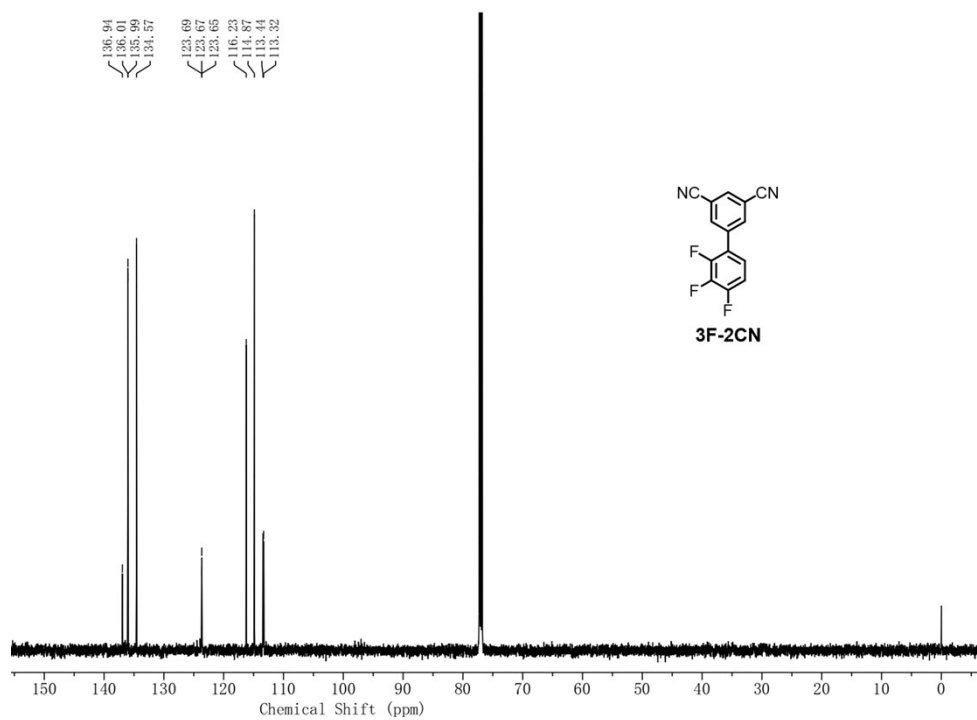

**Fig. S6.**  $^{13}\text{C}$  NMR spectra of 3F-2CN in  $d\text{-CDCl}_3$ .

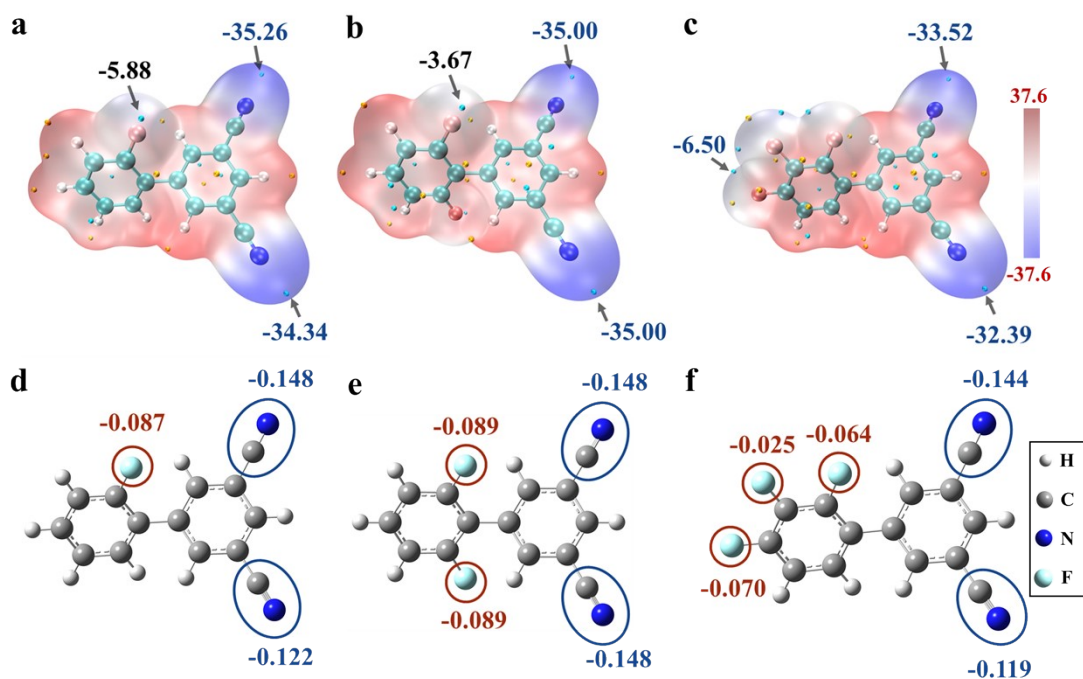

**Fig. S7.** The ESP maps of (a) 1F-2CN, (b) 2F-2CN and (c) 3F-2CN molecules (unit: kcal/mol). The fragment charge of (d) 1F-2CN, (e) 2F-2CN and (f) 3F-2CN molecules.

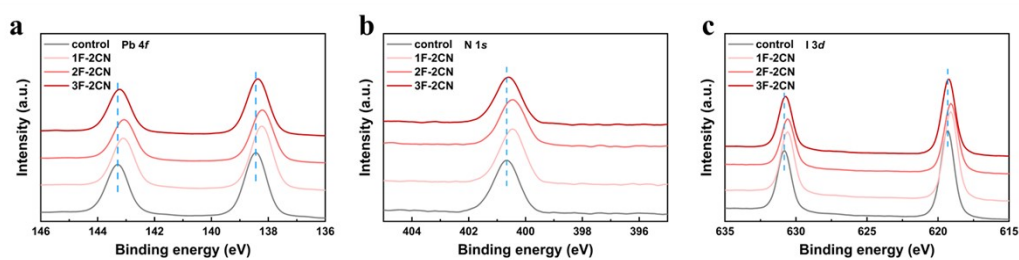

**Fig. S8.** The XPS spectra of perovskite films deposited on ITO glass corresponding to core levels of (a) Pb 4*f*, (b) N 1*s* and (c) I 3*d*.

2023-06-21-YY0124-001-FAI, 1.1.1r  
2023-06-21-YY0124-001-FAI DMSO 1H

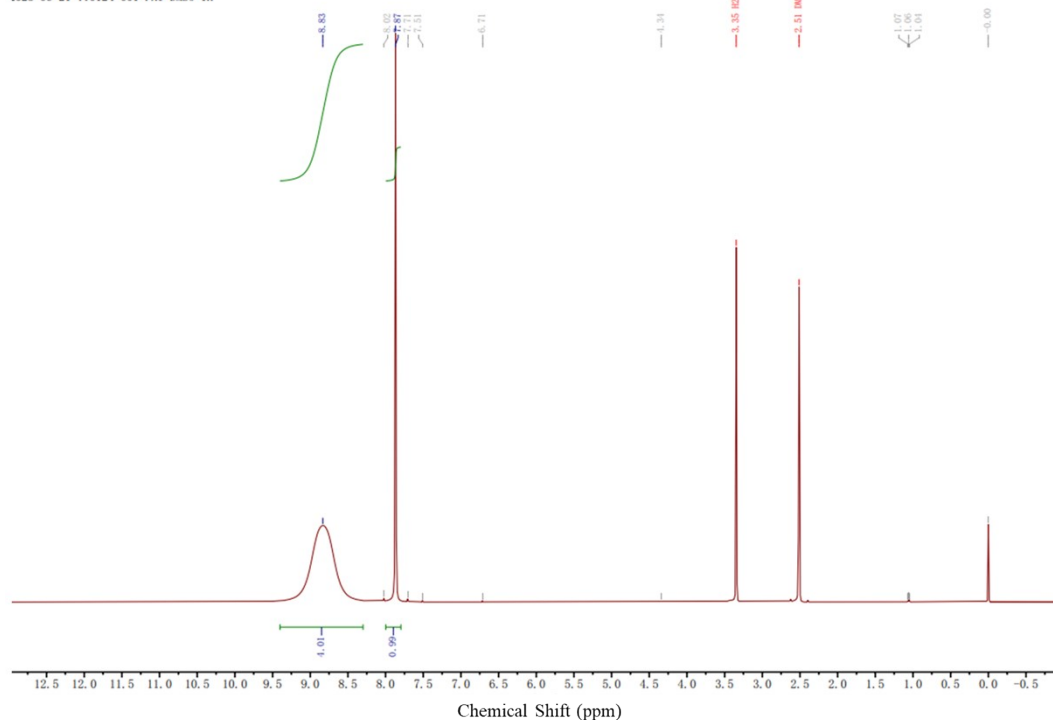

**Fig. S9.**  $^1\text{H}$  NMR spectra of FAI in *d*-DMSO.

2023-06-21-YY0124-002-1F, 1.1.1r  
2023-06-21-YY0124-002-1F DMSO 1H

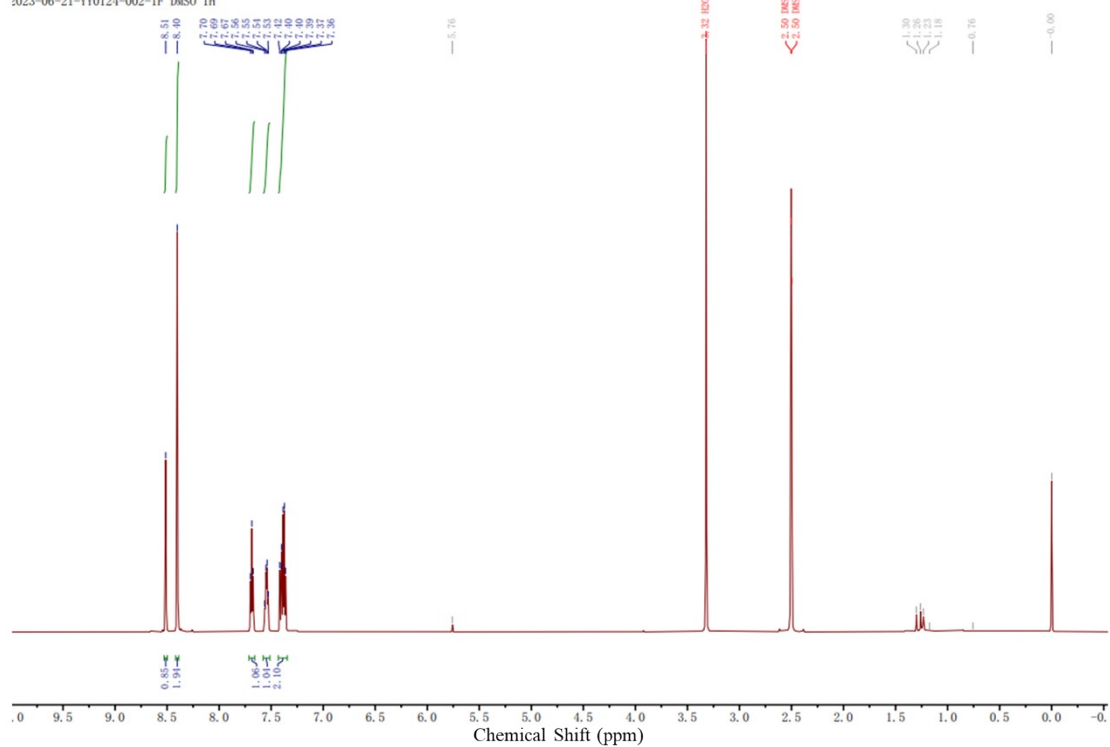

**Fig. S10.**  $^1\text{H}$  NMR spectra of 1F-2CN in *d*-DMSO.

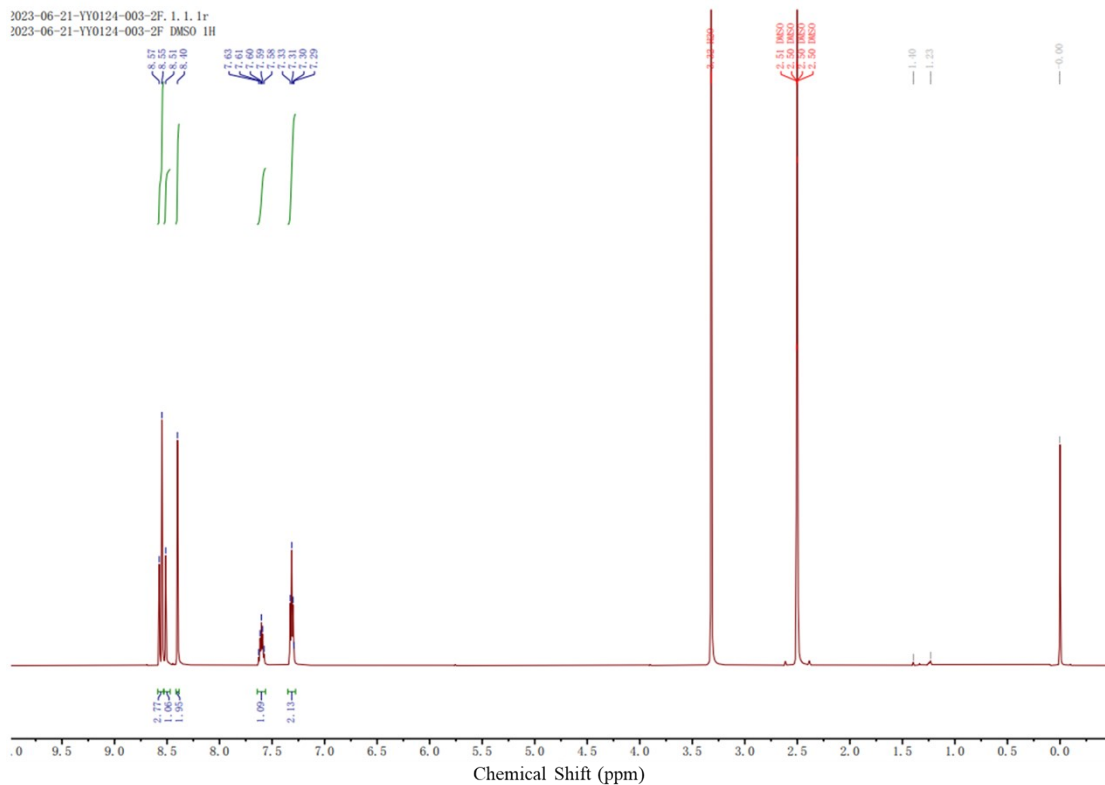

**Fig. S11.**  $^1\text{H}$  NMR spectra of 2F-2CN in *d*-DMSO.

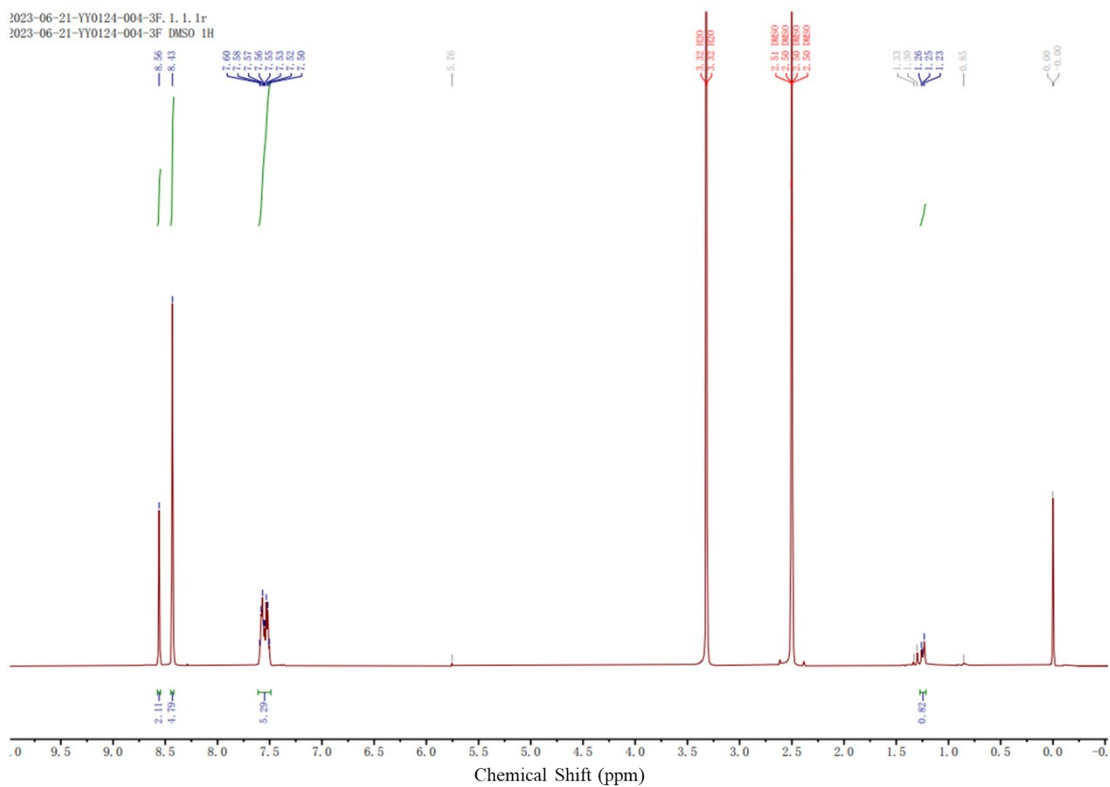

**Fig. S12.**  $^1\text{H}$  NMR spectra of 3F-2CN in *d*-DMSO.

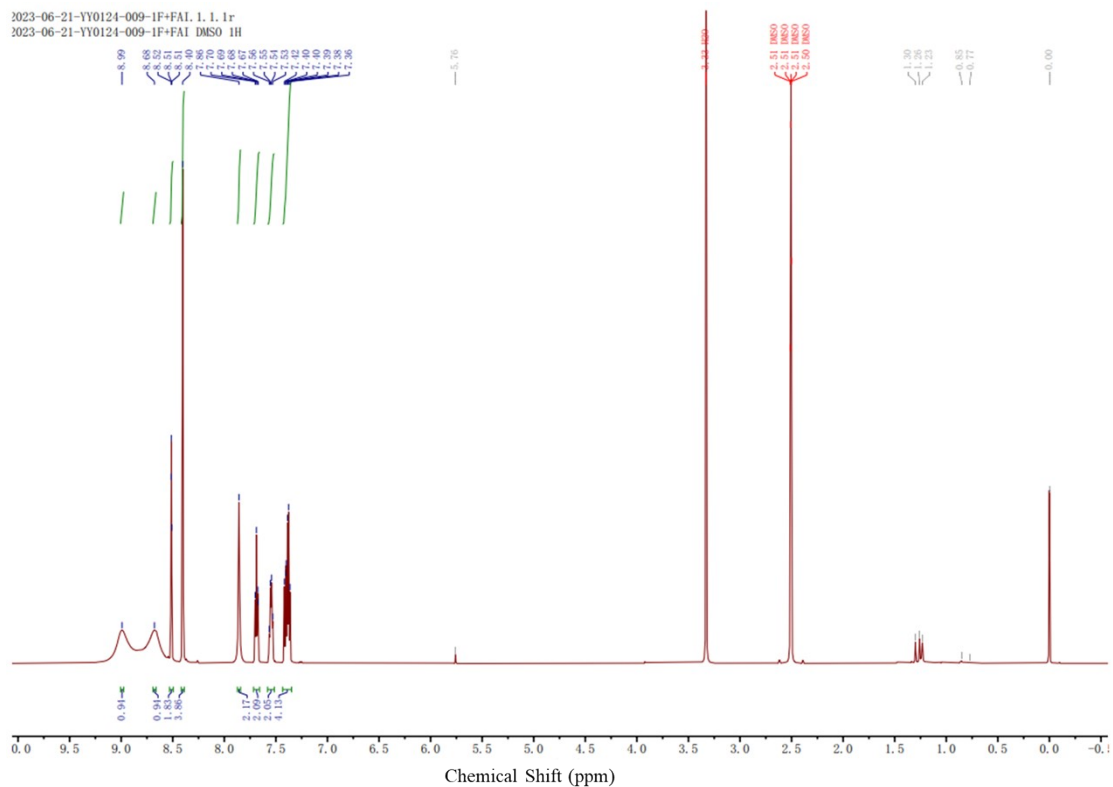

**Fig. S13.**  $^1\text{H}$  NMR spectra of 1F-2CN/FAI in *d*-DMSO.

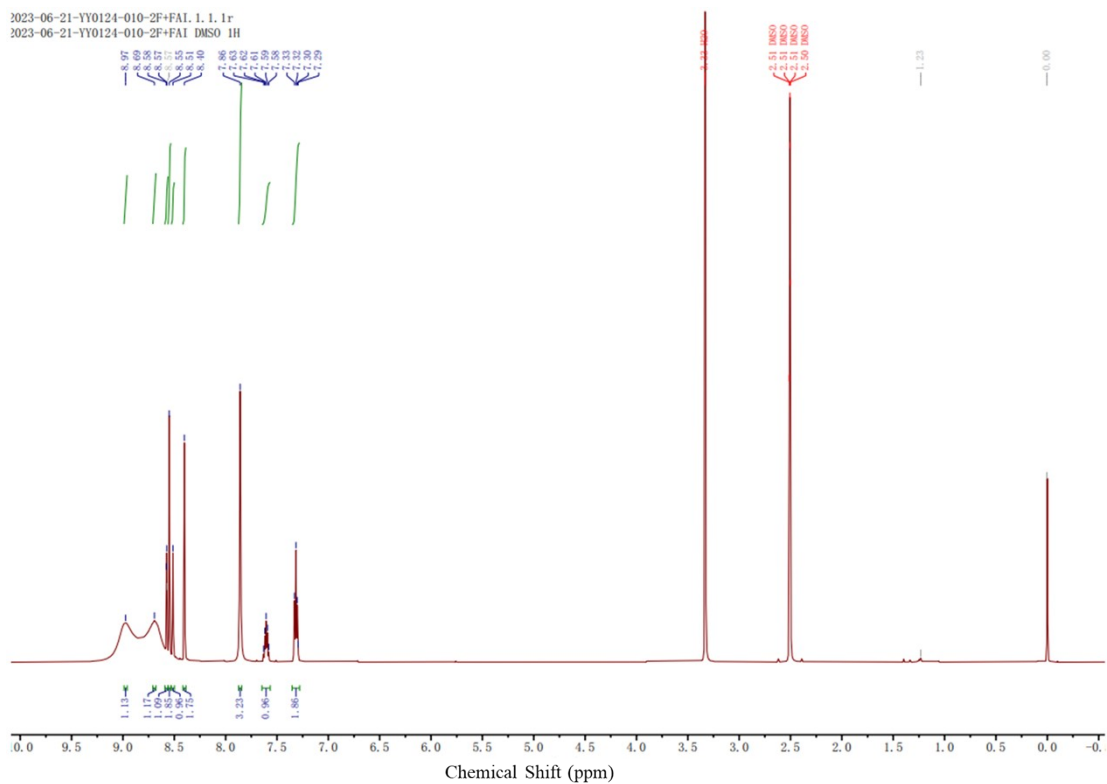

**Fig. S14.**  $^1\text{H}$  NMR spectra of 2F-2CN/FAI in *d*-DMSO.

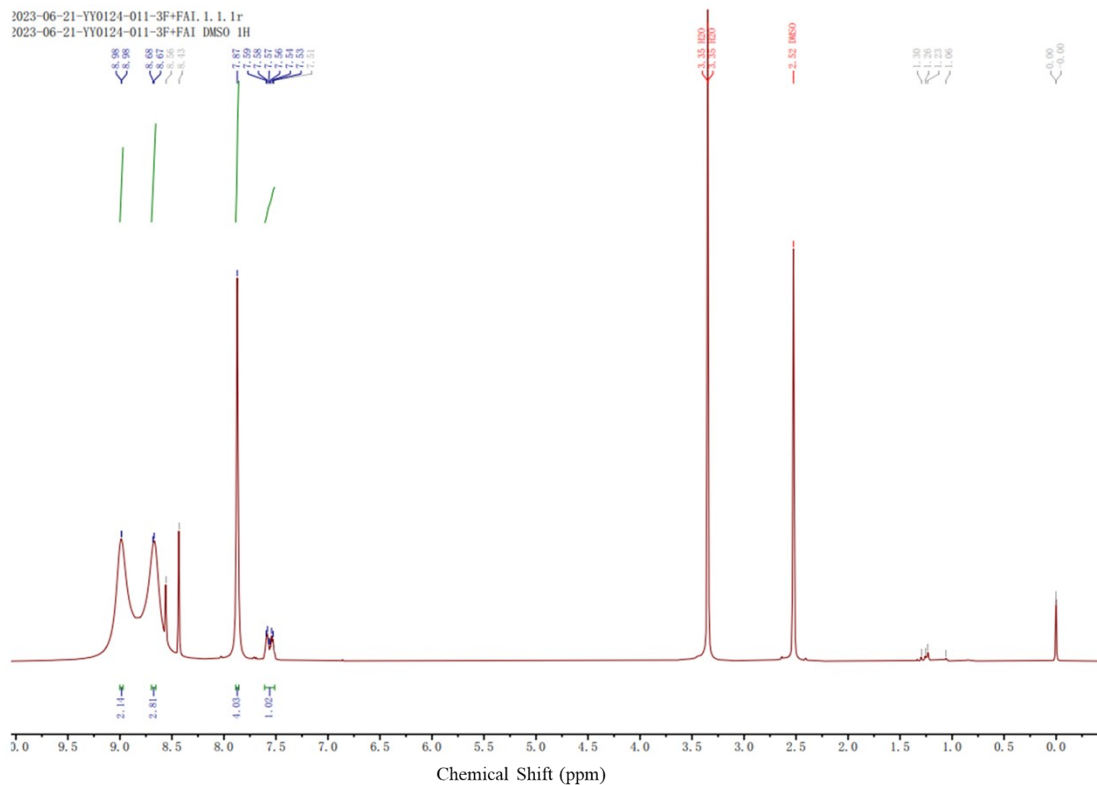

**Fig. S15.**  $^1\text{H}$  NMR spectra of 3F-2CN/FAI in *d*-DMSO.

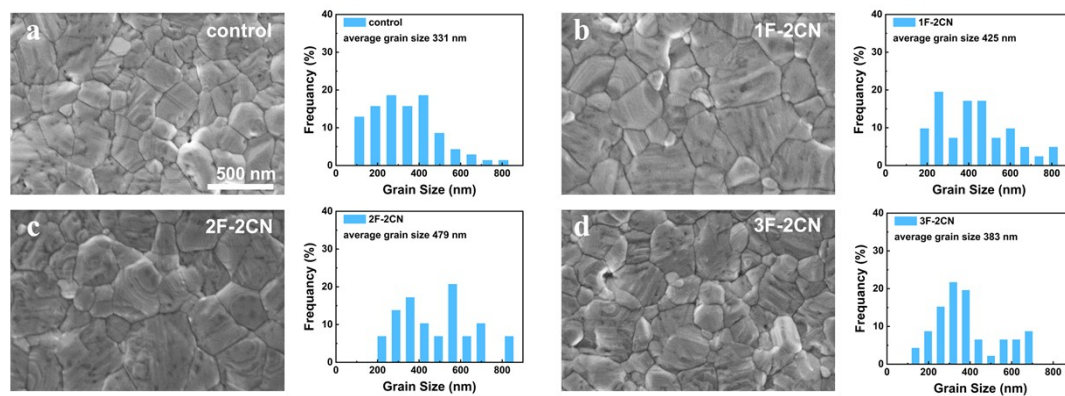

**Fig. S16.** Top-view SEM images and the corresponding grain size distributions of the (a) control, (b) 1F-2CN, (c) 2F-2CN, and (d) 3F-2CN modified perovskite films.

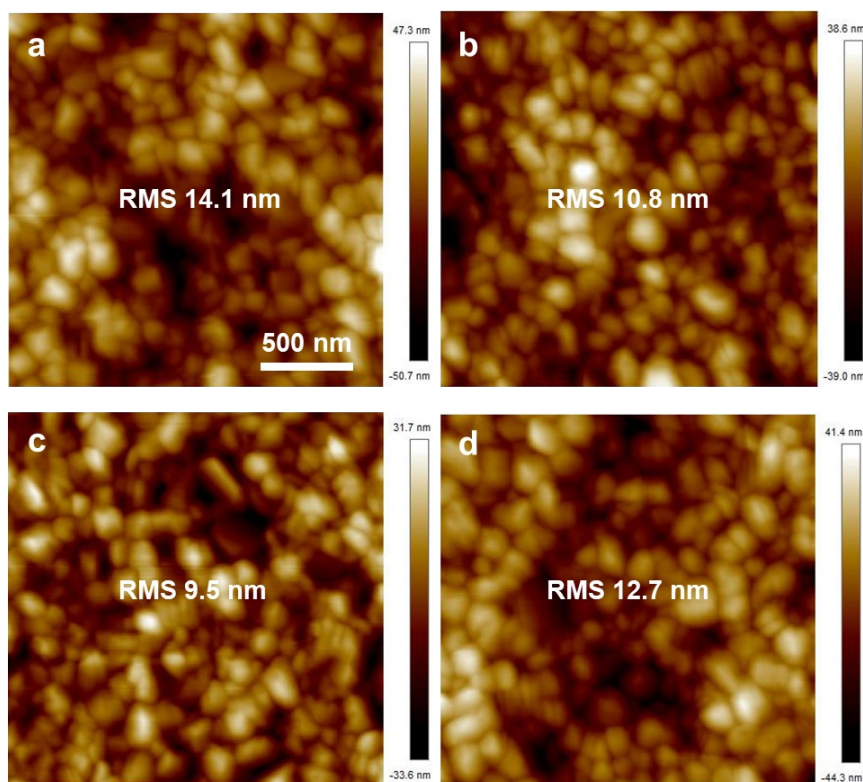

**Fig. S17.** AFM height images of the (a) control, (b) 1F-2CN, (c) 2F-2CN, and (d) 3F-2CN modified perovskite films.

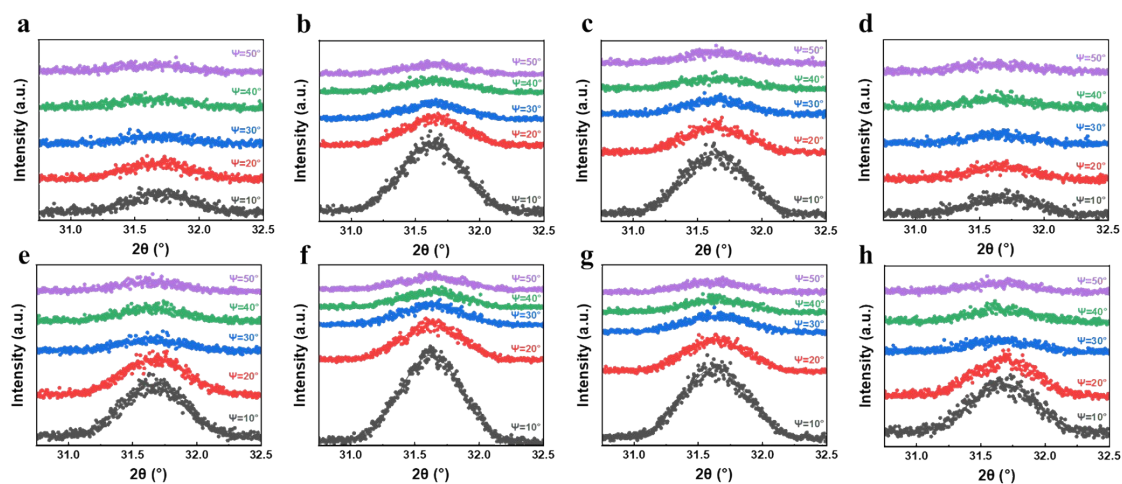

**Fig. S18.** GIXRD with different instrumental  $\Psi$  values of (a) control, (b) 1F-2CN, (c) 2F-2CN, and (d) 3F-2CN modified perovskite films, where the incident angle is  $0.2^\circ$ . GIXRD with different instrumental  $\Psi$  values of (e) control, (f) 1F-2CN, (g) 2F-2CN, and (h) 3F-2CN modified perovskite films, where the incident angle is  $0.5^\circ$ .

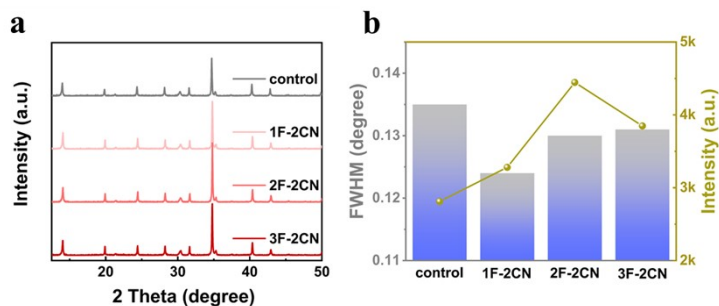

**Fig. S19.** (a) XRD patterns and (b) the corresponding FWHM/intensity of the perovskite films.

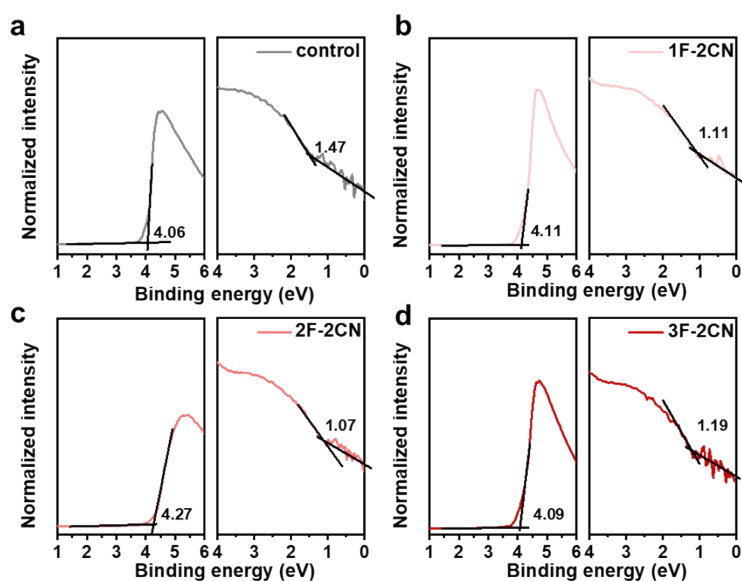

**Fig. S20.** UPS data of the (a) control, (b) 1F-2CN, (c) 2F-2CN, and (d) 3F-2CN modified perovskite films.

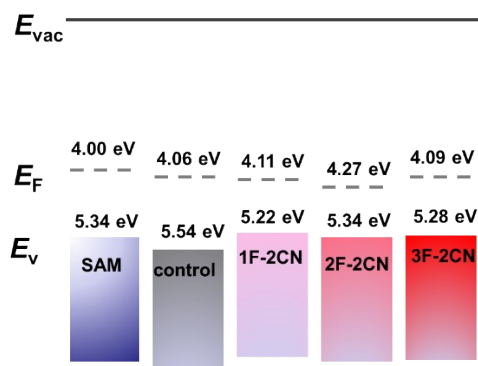

**Fig. S21.** Energy level scheme of the films. Vacuum level ( $E_{vac}$ ), Valence band maximum ( $E_v$ ), Fermi level ( $E_F$ ) and [2-(3,6-dimethoxy-9H-carbazol-9-yl)ethyl] phosphonic acid (SAM).



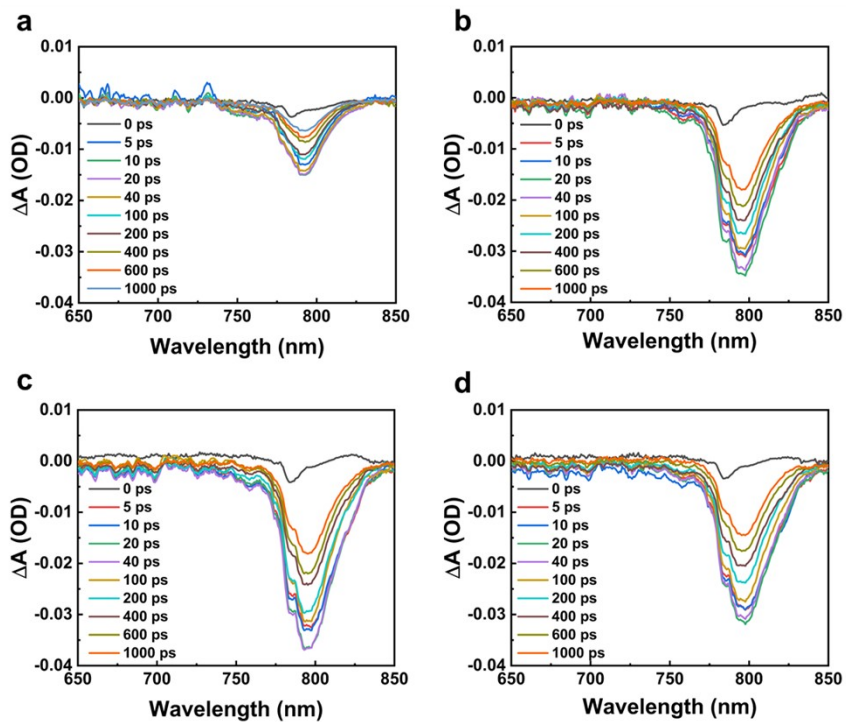

**Fig. S22.** TA spectra at different time delays of (a) control, (b) 1F-2CN, (c) 2F-2CN, and (d) 3F-2CN modified perovskite films.

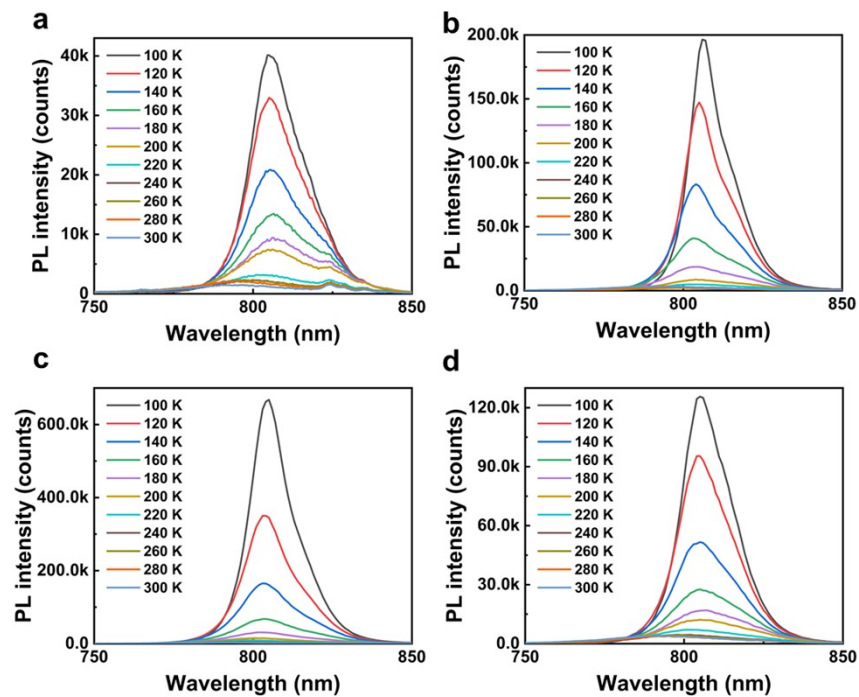

**Fig. S23.** Temperature-dependent PL spectra of (a) control, (b) 1F-2CN, (c) 2F-2CN, and (d) 3F-2CN modified perovskite films.

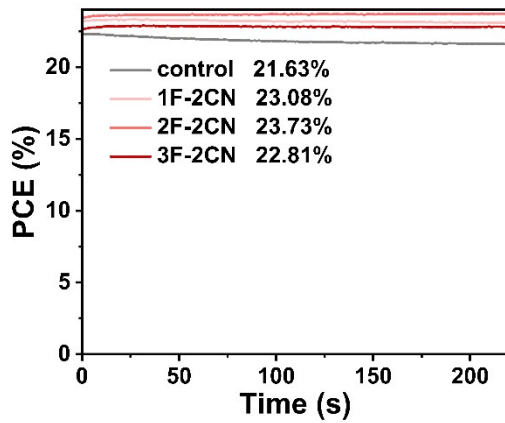

Fig. S24. SPO measurements of devices.

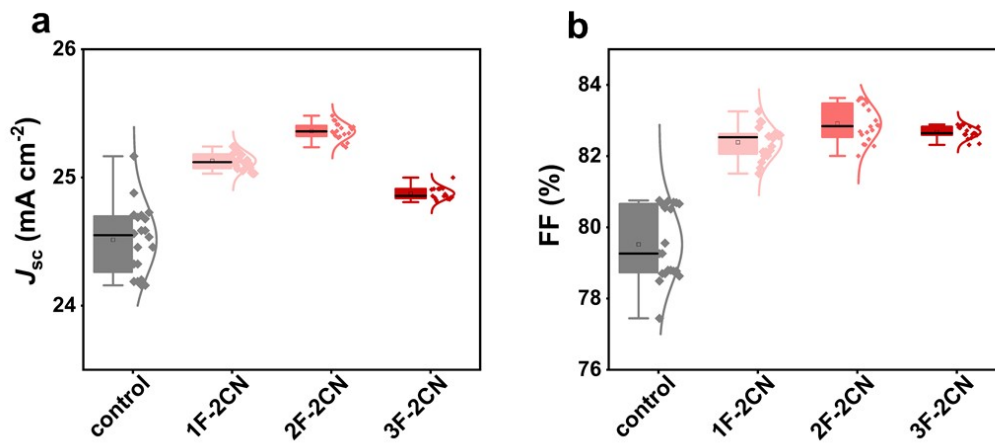

Fig. S25. Statistics of (a)  $J_{sc}$  and (b) FF for 20 devices.

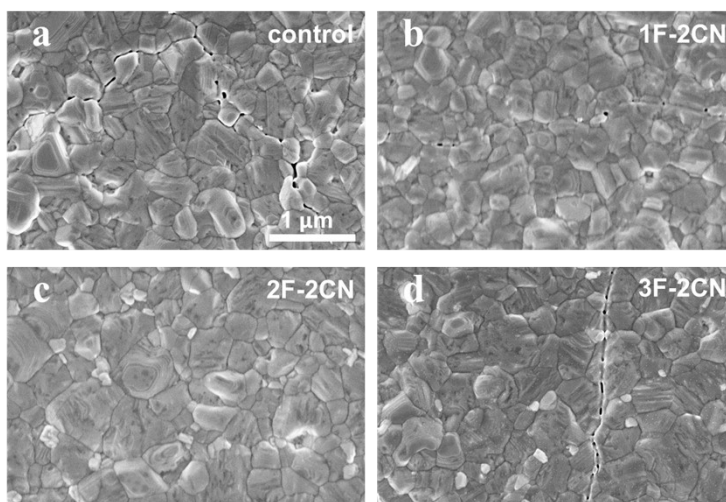

Fig. S26. Top-view SEM images of the (a) control, (b) 1F-2CN, (c) 2F-2CN, and (d) 3F-2CN modified perovskite films after 3000 cycles of bending. Magnification factor 50000 times.

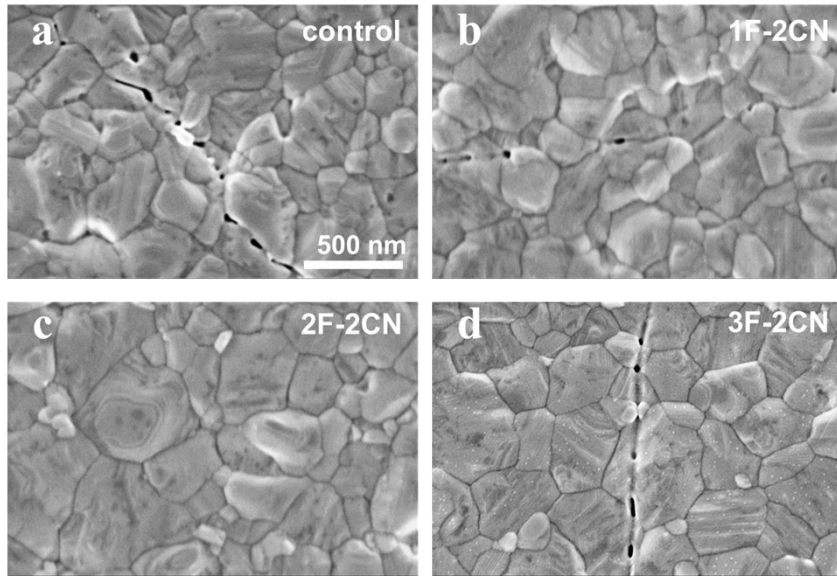

**Fig. S27.** Top-view SEM images of the (a) control, (b) 1F-2CN, (c) 2F-2CN, and (d) 3F-2CN modified perovskite films after 3000 cycles of bending. Magnification factor 80000 times.

**Table S1** Performance summary of inverted f-PSCs.

| Device Structure                                                                                                                                                                   | $J_{sc}$<br>( $\text{mA cm}^{-2}$ ) | $V_{oc}$<br>(V) | FF<br>(%) | PCE<br>(%) | Year               |
|------------------------------------------------------------------------------------------------------------------------------------------------------------------------------------|-------------------------------------|-----------------|-----------|------------|--------------------|
| FTO/PEDOT:PSS/ $\text{CH}_3\text{NH}_3\text{PbI}_{3-x}\text{Cl}_x$ /PC <sub>61</sub> BM/TiO <sub>x</sub> /Al                                                                       | 14.4                                | 0.88            | 51        | 6.4        | 2013 <sup>10</sup> |
| ITO/PEDOT:PSS/ $\text{CH}_3\text{NH}_3\text{PbI}_3$ /PC <sub>61</sub> BM/bis-C <sub>60</sub> /Ag                                                                                   | 14.6                                | 0.86            | 75        | 9.42       | 2014 <sup>11</sup> |
| ITO/PEDOT:PSS/PEI·HI/ $\text{CH}_3\text{NH}_3\text{PbI}_3$ /PC <sub>61</sub> BM/LiF/Ag                                                                                             | 19.0                                | 1.07            | 68        | 13.8       | 2015 <sup>12</sup> |
| ITO/PEDOT:PSS/MoO <sub>3</sub> / $\text{CH}_3\text{NH}_3\text{PbI}_3$ /C <sub>60</sub> /BCP/Ag                                                                                     | 21.5                                | 0.97            | 83        | 17.3       | 2016 <sup>13</sup> |
| ITO/PTAA/FAMAPb(I <sub>x</sub> Br <sub>1-x</sub> ) <sub>3</sub> /PC <sub>61</sub> BM/C <sub>60</sub> /BCP/Cu                                                                       | 22.8                                | 1.06            | 75        | 18.1       | 2017 <sup>14</sup> |
| TFSA-doped GR/PEDOT:PSS/FAPbI <sub>3-x</sub> Br <sub>x</sub> /PC <sub>61</sub> BM/Al                                                                                               | 22.1                                | 1.07            | 77        | 18.3       | 2018 <sup>15</sup> |
| ITO/PTAA/ $\text{CH}_3\text{NH}_3\text{PbI}_3$ -NH <sub>4</sub> Cl/C <sub>60</sub> /BCP/Cu                                                                                         | 22.8                                | 1.09            | 79        | 19.72      | 2019 <sup>16</sup> |
| ITO/NiO <sub>x</sub> (F2HCNQ)/CsMAFAPbI <sub>x</sub> Br <sub>3-x</sub> /PC <sub>61</sub> BM/BCP/Ag                                                                                 | 22.2                                | 1.12            | 81        | 20.01      | 2020 <sup>17</sup> |
| ITO/PTAA/Cs <sub>0.05</sub> (FA <sub>0.98</sub> MA <sub>0.02</sub> ) <sub>0.95</sub> Pb(I <sub>0.98</sub> Br <sub>0.02</sub> ) <sub>3</sub> /Organic BHJ/Zr(acac) <sub>4</sub> /Ag | 24.8                                | 1.13            | 78        | 21.73      | 2021 <sup>18</sup> |
| ITO/PTAA/PenAAc/Cs <sub>0.05</sub> (FA <sub>0.98</sub> MA <sub>0.02</sub> ) <sub>0.95</sub> Pb(I <sub>0.98</sub> Br <sub>0.02</sub> ) <sub>3</sub> /C <sub>60</sub> /BCP/Ag        | 24.8                                | 1.17            | 81        | 23.68      | 2022 <sup>19</sup> |
| ITO/DC-PA/Cs <sub>0.05</sub> (FA <sub>0.98</sub> MA <sub>0.02</sub> ) <sub>0.95</sub> Pb(I <sub>0.98</sub> Br <sub>0.02</sub> ) <sub>3</sub> /C <sub>60</sub> /BCP/Ag              | 24.1                                | 1.19            | 81        | 23.23      | 2023 <sup>20</sup> |
| ITO/MeO-2PACz/Cs <sub>0.05</sub> (FA <sub>0.98</sub> MA <sub>0.02</sub> ) <sub>0.95</sub> Pb(I <sub>0.98</sub> Br <sub>0.02</sub> ) <sub>3</sub> /C <sub>60</sub> /BCP/Ag          | 25.3                                | 1.14            | 84        | 24.08      | This work          |

**Table S2** Fitted lifetimes for perovskite films from TRPL measurements.

| <b>Film</b> | <b>A<sub>1</sub></b> | <b><math>\tau_1</math> (ns)</b> | <b>A<sub>2</sub></b> | <b><math>\tau_2</math> (ns)</b> | <b><math>\tau_a</math> (ns)</b> |
|-------------|----------------------|---------------------------------|----------------------|---------------------------------|---------------------------------|
| control     | 109.67               | 6.20                            | 59.87                | 236.57                          | 226.02                          |
| 1F-2CN      | 527.97               | 5.40                            | 288.01               | 327.03                          | 317.57                          |
| 2F-2CN      | 551.80               | 4.27                            | 249.00               | 346.97                          | 337.88                          |
| 3F-2CN      | 446.43               | 5.14                            | 222.21               | 271.71                          | 261.96                          |

**Table S3** Fitted lifetimes for perovskite films from TAS measurements.

| <b>Film</b> | <b>A<sub>1</sub></b> | <b><math>\tau_1</math> (ps)</b> | <b>A<sub>2</sub></b> | <b><math>\tau_2</math> (ps)</b> | <b><math>\tau_a</math> (ps)</b> |
|-------------|----------------------|---------------------------------|----------------------|---------------------------------|---------------------------------|
| control     | -0.30                | 184.83                          | -0.55                | 1132.90                         | 1056.58                         |
| 1F-2CN      | -0.28                | 141.23                          | -0.62                | 1531.64                         | 1476.07                         |
| 2F-2CN      | -0.34                | 159.27                          | -0.73                | 2621.22                         | 2554.32                         |
| 3F-2CN      | -0.29                | 175.46                          | -0.49                | 1334.97                         | 1252.36                         |

**Table S4** Parameters derived via fitting the temperature-dependent FWHM.

| <b>Film</b> | <b><math>\Gamma_{inh}</math> (meV)</b> | <b><math>\Gamma_{LO}</math> (meV)</b> | <b><math>h\omega</math> (meV)</b> |
|-------------|----------------------------------------|---------------------------------------|-----------------------------------|
| control     | 43                                     | 1429                                  | 842                               |
| 1F-2CN      | 16                                     | 53                                    | 156                               |
| 2F-2CN      | 3                                      | 26                                    | 81                                |
| 3F-2CN      | 27                                     | 77                                    | 220                               |

**Table S5** The photovoltaic parameters for f-PSCs.

| <b>device</b> | <b>scan</b> | <b><math>J_{sc}</math><br/>(mA cm<sup>-2</sup>)</b> | <b><math>V_{oc}</math><br/>(V)</b> | <b>FF<br/>(%)</b> | <b>PCE<br/>(%)</b> | <b>HI<br/>(%)</b> |
|---------------|-------------|-----------------------------------------------------|------------------------------------|-------------------|--------------------|-------------------|
| control       | reverse     | 24.88                                               | 1.105                              | 79.56             | 21.87              | 2.01              |
|               | forward     | 24.52                                               | 1.097                              | 78.10             | 21.01              |                   |
| 1F-2CN        | reverse     | 25.18                                               | 1.134                              | 82.80             | 23.64              | 0.20              |
|               | forward     | 25.10                                               | 1.131                              | 82.96             | 23.54              |                   |
| 2F-2CN        | reverse     | 25.36                                               | 1.136                              | 83.57             | 24.08              | 0.21              |
|               | forward     | 25.31                                               | 1.133                              | 83.59             | 23.98              |                   |
| 3F-2CN        | reverse     | 24.91                                               | 1.129                              | 82.89             | 23.30              | 0.23              |
|               | forward     | 24.82                                               | 1.127                              | 82.89             | 23.20              |                   |

$$HI(\%) = \frac{PCE_{Reverse} - PCE_{Forward}}{PCE_{Reverse}}$$

The  $J$ - $V$  HI is defined by the equation:

**Table S6** The photovoltaic parameters for f-PSCs.

| <b>device</b> | <b><math>J_{sc}</math><br/>(mA cm<sup>-2</sup>)</b> | <b><math>V_{oc}</math><br/>(V)</b> | <b>FF<br/>(%)</b> | <b>PCE<br/>(%)</b> |
|---------------|-----------------------------------------------------|------------------------------------|-------------------|--------------------|
| control       | 24.51±0.27                                          | 1.095±0.01                         | 79.52±1.03        | 21.35±0.42         |
| 1F-2CN        | 25.13±0.07                                          | 1.131±0.01                         | 82.39±0.46        | 23.42±0.11         |
| 2F-2CN        | 25.36±0.06                                          | 1.135±0.01                         | 82.92±0.52        | 23.86±0.13         |
| 3F-2CN        | 24.87±0.05                                          | 1.126±0.01                         | 82.67±0.17        | 23.15±0.07         |

1. H. Wang, C. Zhu, L. Liu, S. Ma, P. Liu, J. Wu, C. Shi, Q. Du, Y. Hao, S. Xiang, H. Chen, P. Chen, Y. Bai, H. Zhou, Y. Li and Q. Chen, *Adv. Mater.*, 2019, **31**, 1904408.
2. C. Zhu, X. Niu, Y. Fu, N. Li, C. Hu, Y. Chen, X. He, G. Na, P. Liu, H. Zai, Y. Ge, Y. Lu, X. Ke, Y. Bai, S. Yang, P. Chen, Y. Li, M. Sui, L. Zhang, H. Zhou and Q. Chen, *Nat. Commun.*, 2019, **10**, 815.
3. J. Li, L. Xie, Z. Pu, C. Liu, M. Yang, Y. Meng, B. Han, S. Bu, Y. Wang, X. Zhang, T. Wang and Z. Ge, *Adv. Funct. Mater.*, 2023, 2301956.
4. L. Xie, J. Liu, J. Li, C. Liu, Z. Pu, P. Xu, Y. Wang, Y. Meng, M. Yang and Z. Ge, *Adv. Mater.*, 2023, e2302752.
5. R. Su, Z. Xu, J. Wu, D. Luo, Q. Hu, W. Yang, X. Yang, R. Zhang, H. Yu, T. P. Russell, Q. Gong, W. Zhang and R. Zhu, *Nat. Commun.*, 2021, **12**, 2479.
6. H. Chen, Y. Wang, Y. Fan, Y. Chen, Y. Miao, Z. Qin, X. Wang, X. Liu, K. Zhu, F. Gao and Y. Zhao, *Natl. Sci. Rev.*, 2022, **9**, nwac127.
7. X. Yang, Y. Fu, R. Su, Y. Zheng, Y. Zhang, W. Yang, M. Yu, P. Chen, Y. Wang, J. Wu, D. Luo, Y. Tu, L. Zhao, Q. Gong and R. Zhu, *Adv. Mater.*, 2020, **32**, 2002585.
8. Y. Meng, C. Liu, R. Cao, J. Zhang, L. Xie, M. Yang, L. Xie, Y. Wang, X. Yin, C. Liu and Z. Ge, *Adv. Funct. Mater.*, 2023, 2214788.
9. L. Xie, X. Zhao, J. Wang, J. Li, C. Liu, S. Wang, Q. Bao, M. Yang, X. Niu, F. Hao and Z. Ge, *INFOMAT*, 2023, **5**, e12379.
10. P. Docampo, J. M. Ball, M. Darwich, G. E. Eperon and H. J. Snaith, *Nat. Commun.*, 2013, **4**, 2761.
11. J. W. Jung, S. T. Williams and A. K. Y. Jen, *RSC Adv.*, 2014, **4**, 62971-62977.
12. K. Yao, X. Wang, Y.-x. Xu and F. Li, *Nano Energy*, 2015, **18**, 165-175.
13. J. Yoon, H. Sung, G. Lee, W. Cho, N. Ahn, H. S. Jung and M. Choi, *Energy Environ. Sci.*, 2016, **10**, 337-345.
14. C. Bi, B. Chen, H. Wei, S. DeLuca and J. Huang, *Adv. Mater.*, 2017, **29**, 1605900.
15. J. H. Heo, D. H. Shin, D. H. Song, D. H. Kim, S. J. Lee and S. H. Im, *J. Mater. Chem. A*, 2018, **6**, 8251-8258.
16. X. Dai, Y. Deng, C. H. Van Brackle, S. Chen, P. N. Rudd, X. Xiao, Y. Lin, B. Chen and J. Huang, *Adv. Energy Mater.*, 2020, **10**, 1903108.
17. P. Ru, E. Bi, Y. Zhang, Y. Wang, W. Kong, Y. Sha, W. Tang, P. Zhang, Y. Wu, W. Chen, X. Yang, H. Chen and L. Han, *Adv. Energy Mater.*, 2020, **10**, 1903487.
18. S. Wu, Z. Li, J. Zhang, X. Wu, X. Deng, Y. Liu, J. Zhou, C. Zhi, X. Yu, W. C. H. Choy, Z. Zhu and A. K. Y. Jen, *Adv. Mater.*, 2021, **33**, 2105539.
19. D. Gao, B. Li, Z. Li, X. Wu, S. Zhang, D. Zhao, X. Jiang, C. Zhang, Y. Wang, Z. Li, N. Li, S. Xiao, W. C. H. Choy, A. K. Y. Jen, S. Yang and Z. Zhu, *Adv. Mater.*, 2023, **35**, 2206387.
20. S. Wu, J. Zhang, M. Qin, F. Li, X. Deng, X. Lu, W.-J. Li and A. K. Y. Jen, *Small*, 2023, 2207189.
